# Supplementary material for: Near-infrared light-responsive hybrid hydrogels for the synergistic chemo-photothermal therapy of oral cancer
Source: Royal Society of Chemistry journal article supplement (doi:10.1039/d1nr04625j), 2021-01-01
Supplement: d1nr04625j1.pdf [file d1nr04625j1.pdf]

## **Near-Infrared Light-Responsive Hybrid Hydrogels for Synergistic Chemo-Photothermal Therapy of Oral Cancer**

Yongzhi Wu<sup>a</sup>, Fangman Chen<sup>b</sup>, Nengwen Huang<sup>a</sup>, Jinjin Li<sup>a</sup>, Chenzhou Wu<sup>a</sup>, Bowen Tan<sup>a</sup>, Yunkun Liu<sup>a</sup>, Longjiang Li<sup>a</sup>, Chao Yang<sup>b,\*</sup>, Dan Shao<sup>c</sup>, Jinfeng Liao<sup>a,\*</sup>

<sup>a</sup> State Key Laboratory of Oral Diseases, National Clinical Research Centre for Oral Diseases, West China Hospital of Stomatology, Sichuan University, Chengdu, 610041, China.

<sup>b</sup> School of Biomedical Sciences and Engineering, South China University of Technology, Guangzhou International Campus, Guangzhou, Guangdong 510006, China

<sup>c</sup> Institutes for Life Sciences, School of Medicine, South China University of Technology, Guangzhou, Guangdong 510006, China

Corresponding author:

Dr. Jinfeng Liao, State Key Laboratory of Oral Diseases, National Clinical Research Centre for Oral Diseases, West China Hospital of Stomatology, Sichuan University, Chengdu, 610041, China. E-mail: liaojinfeng.762@163.com

Dr. Chao Yang, School of Biomedical Sciences and Engineering, South China University of Technology, Guangzhou International Campus, Guangzhou, Guangdong 510006, China. E-mail: chaoyang@scut.edu.cn

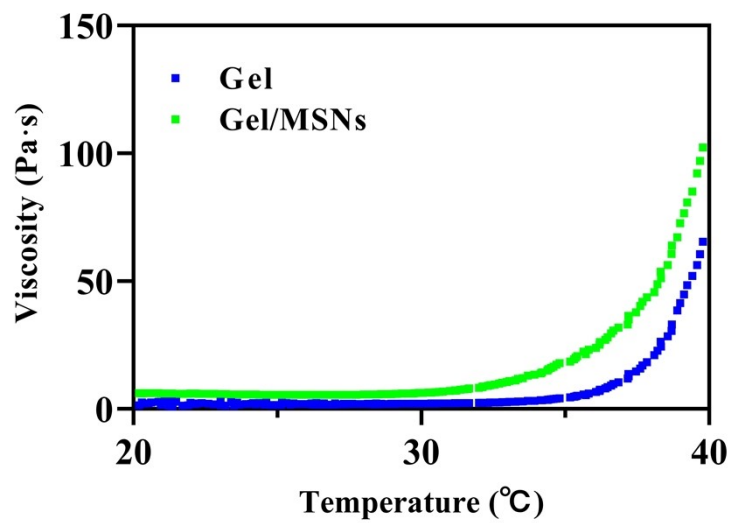

Fig. S1 Dynamic viscosity measurements of Gel and Gel/MSNs.

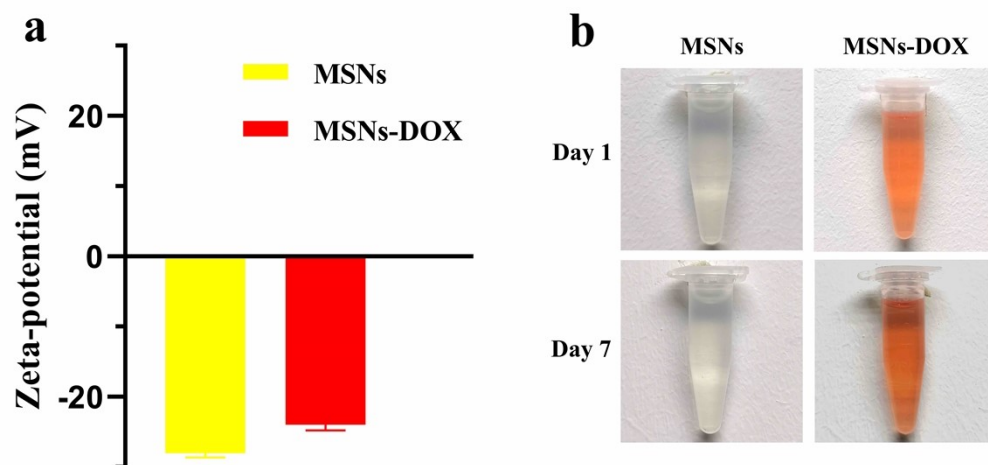

**Fig. S2 Characterizations of MSNs and MSNs-DOX.** (a) Zeta potential of MSNs and MSNs-DOX dispersed in DI water. (b) The pictures of MSNs and MSNs-DOX dispersed in DI water.

**a**

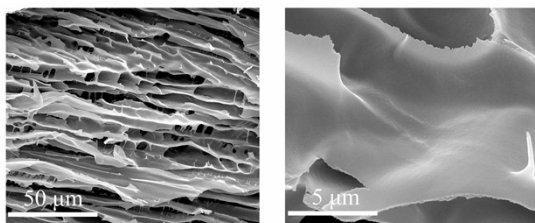

**b**

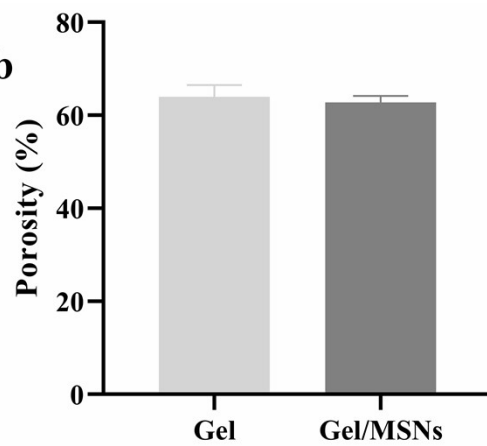

**Fig. S3** Morphology characterizations of resulting hydrogels. (a) SEM images of blank gel. (b) The porosities of Gel and Gel/MSNs.

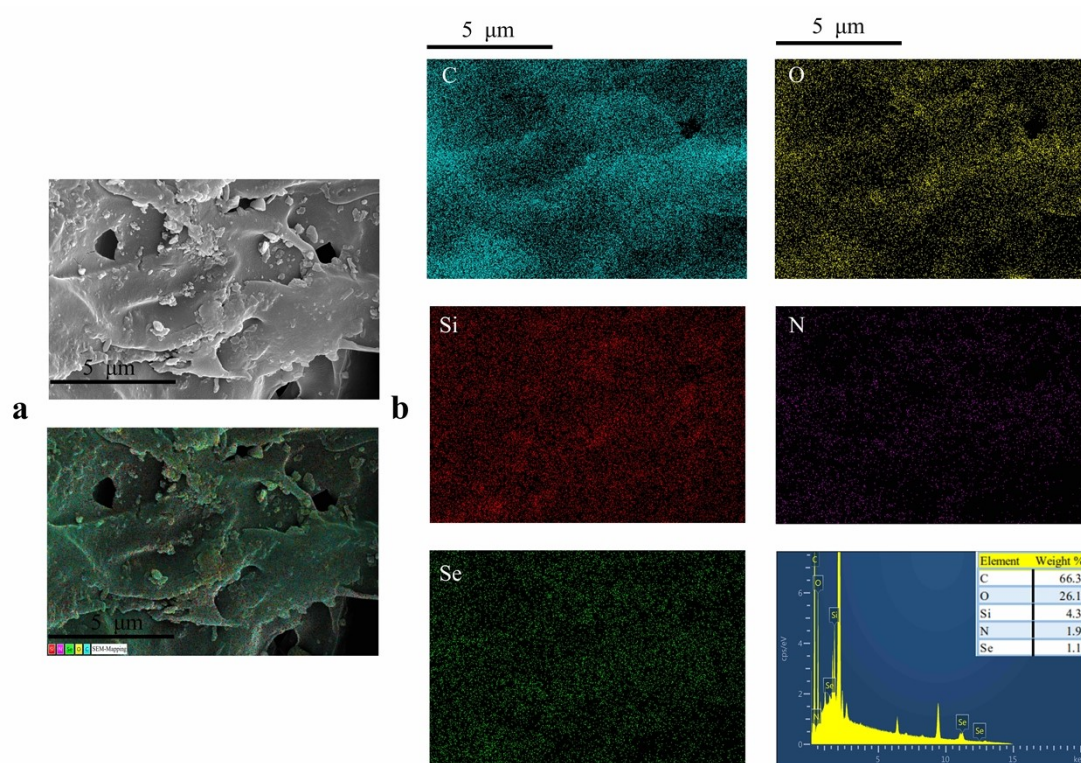

**Fig. S4** SEM-mapping and EDS analysis of the MC/MSNs hydrogel. (a) The SEM images of Gel/MSNs. (b) Element mapping and weight measurement of the hydrogel.

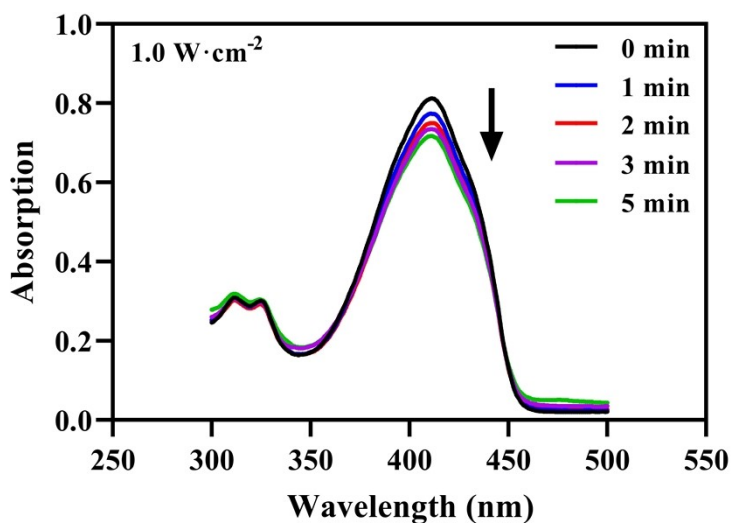

**Fig. S5** Decay curves of the absorption of DPBF by singlet oxygen generated from Gel/IR820 under  $1.0 \text{ W}\cdot\text{cm}^{-2}$  irradiation at 808 nm.

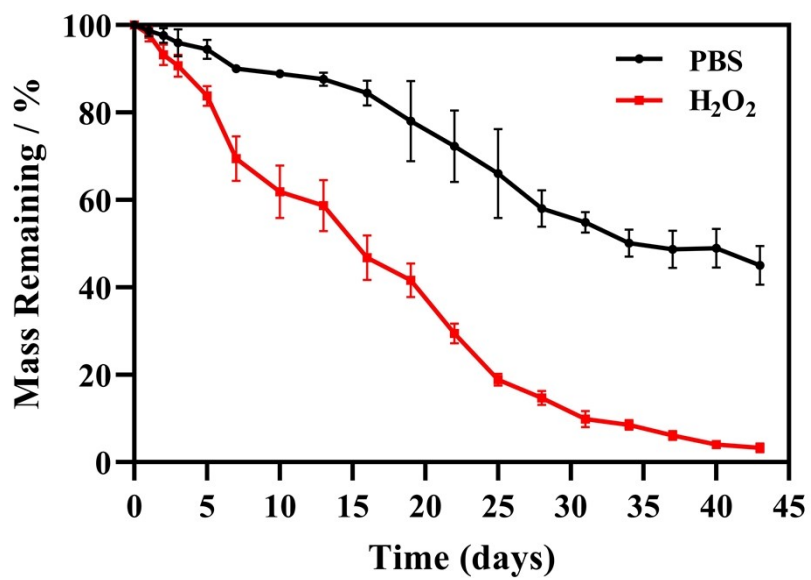

**Fig. S6** *In vitro* degradation of Gel/MSNs in different mediums.

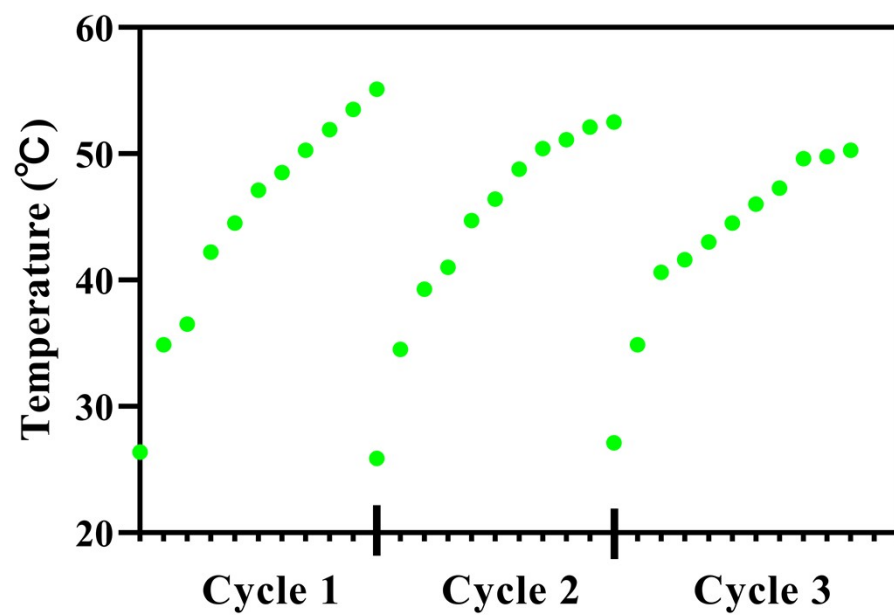

**Fig. S7** Temperature profiles of IR820-loaded hydrogel (200  $\mu\text{g}/\text{mL}$ ) subjected to three cycles of NIR irradiation ( $2.0 \text{ W}\cdot\text{cm}^{-2}$ ).



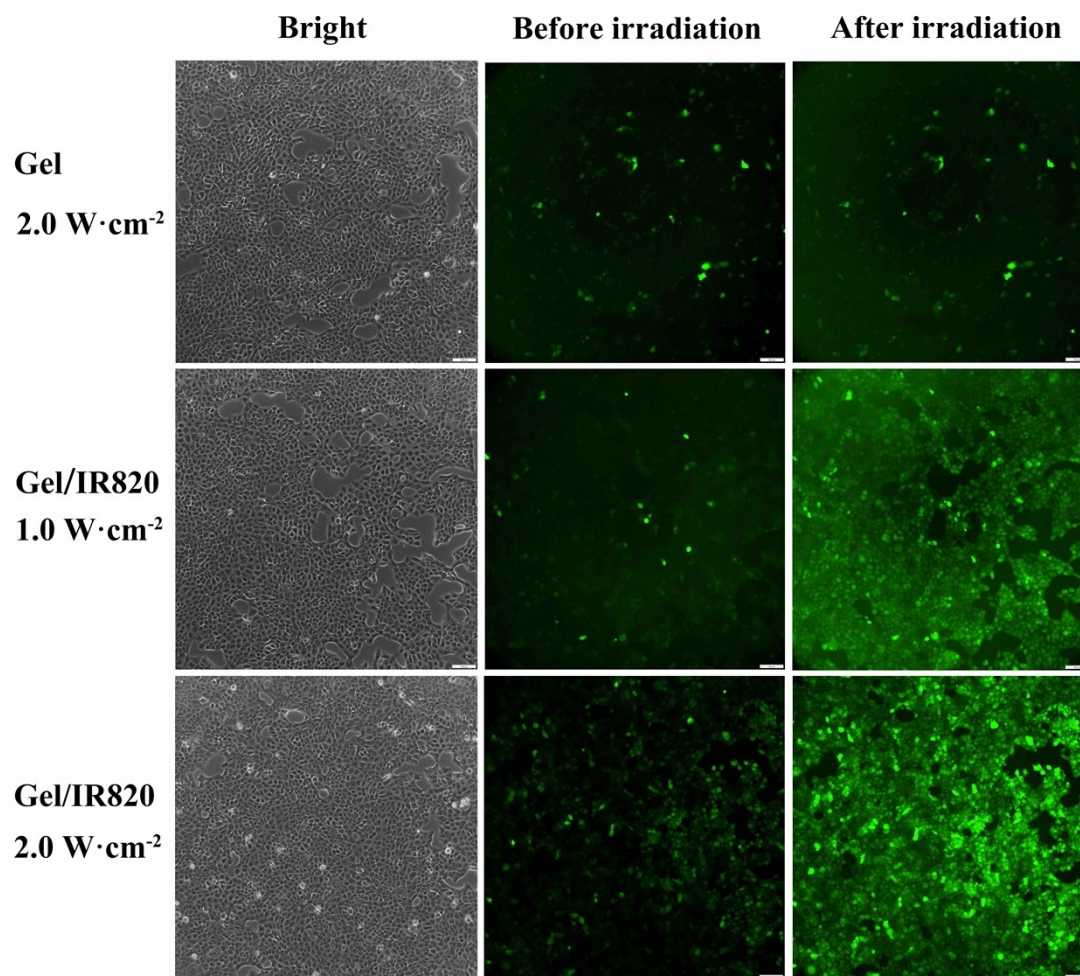

**Fig. S8** Fluorescence images of ROS generation in Cal27 cells with incubation of IR820-containing Gel before and after irradiation; scale bar 100  $\mu\text{m}$ .

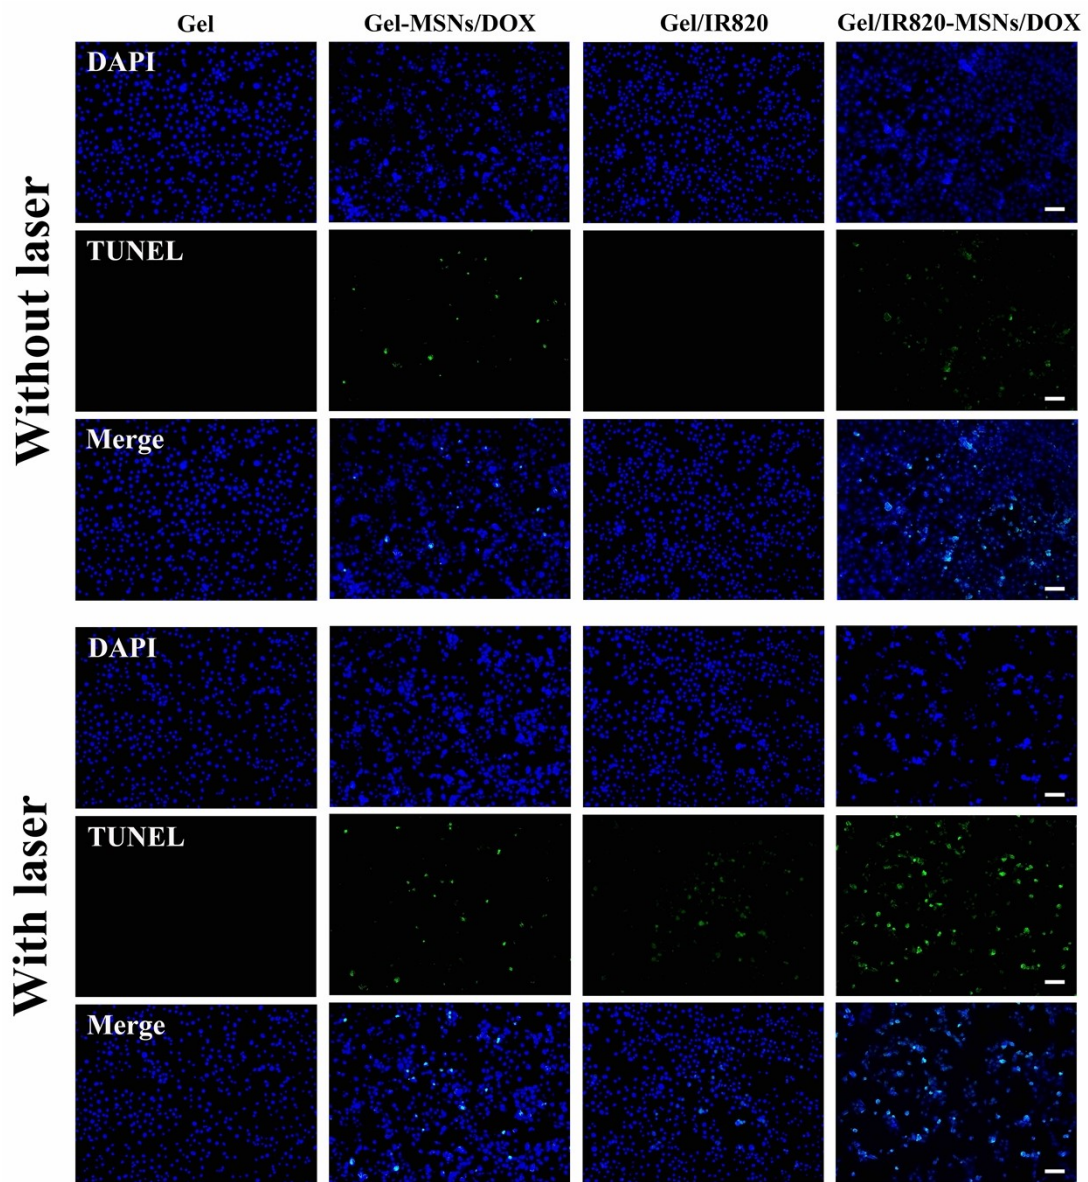

**Fig. S9** Assessment of the apoptosis of Cal27 cells under indicated treatments by TUNEL assay.

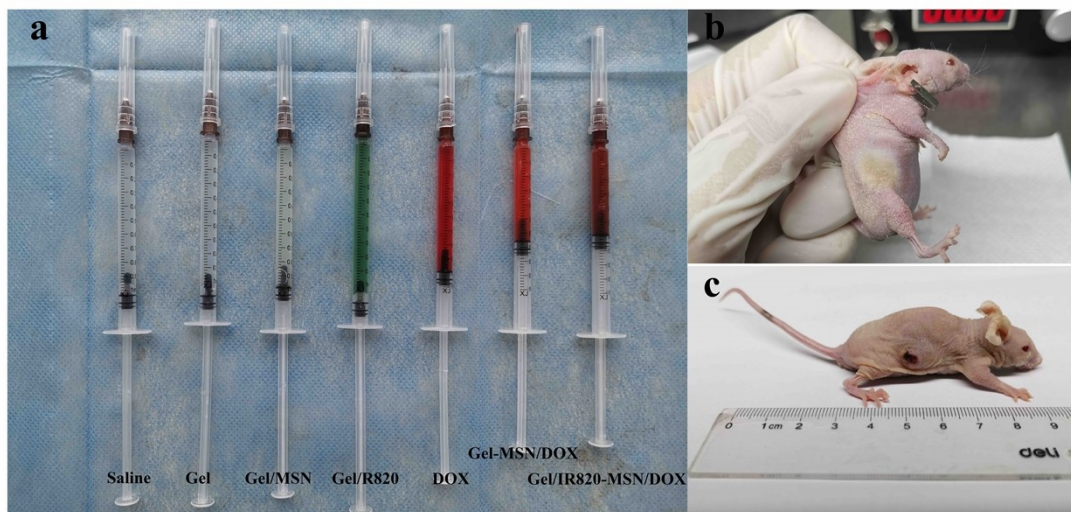

**Fig. S10** *In vivo* photo-chemo therapy. (a) Photos of the injectable formulations. Photos of tumor-bearing mice after NIR irradiation at (b) 2 h and (c) day 3 in G7.
